# Supplementary material for: Improved Thermo-Mechanical Properties and Reduced Hydrogen Permeation of Short Side-Chain Perfluorosulfonic Acid Membranes Doped with Ti3C2Tx
Source: Materials (Basel). 2021 Dec 19;14(24):7875. doi: 10.3390/ma14247875 (PMC8703456; doi:10.3390/ma14247875)
Supplement: Supplementary file 1 [file materials-14-07875-s001.zip › materials-1492216-supplementary (1)--revised.pdf]

Article

# Improved Thermo-Mechanical Properties and Reduced Hydrogen Permeation of Short Side-Chain Perfluorosulfonic Acid Membranes Doped with $\text{Ti}_3\text{C}_2\text{T}_x$

Panpan Guan <sup>1</sup>, Jianlong Lei <sup>1</sup>, Yecheng Zou <sup>2</sup> and Yongming Zhang <sup>1,3,\*</sup>

<sup>1</sup> Center of Hydrogen Science, School of Chemistry and Chemical Engineering, Shanghai Jiao Tong University, Shanghai 200240, China; guanpanpan@sjtu.edu.cn (P.G.); ljl2011@126.com (J.L.)

<sup>2</sup> Dongyue Future Hydrogen Energy Materials Company, Zibo 256401, China; yechengzou@dongyuechem.com

<sup>3</sup> State Key Laboratory of Fluorinated Functional Membrane Materials, Zibo 256401, China

\* Correspondence: ymzhang@sjtu.edu.cn

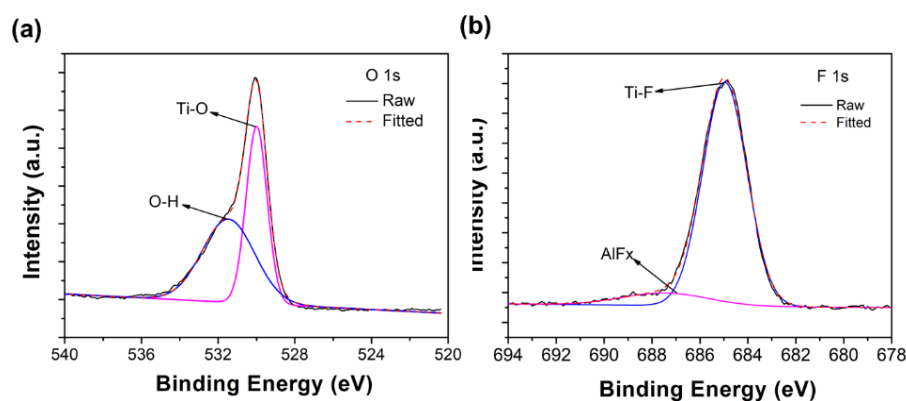

**Figure S1.** Deconvoluted high-resolution XPS spectra of (a) O 1s and (b) F 1s of  $\text{Ti}_3\text{C}_2\text{T}_x$ .
